# Supplementary material for: The incremental subgradient methods on distributed estimations in-network
Source: Springer Nature journal article supplement (doi:10.1007/s11432-013-4944-0), 2014-01-08
Supplement: 11432_2013_4944_MOESM1_ESM.pdf [file 11432_2013_4944_MOESM1_ESM.pdf]

中文题目：在网分布式估计的增量次梯度方法

关键词：分布式信号处理，在网信号处理，分布式估计，增量次梯度，最优化方法

创新点：(1) 将增量次梯度算法应用于在网分布式估计；(2) 将经典的分布式估计转化为无约束的分离最优化问题形式；(3) 节点之间采用接力传递可大幅降低网络中的并发通信量。本文提出了利用增量次梯度方法进行在网分布式估计的统一框架。作为近年发展出来的一种异步算法，增量次梯度方法可以解决不可导的分离凸优化问题。本文的主要贡献是将经典的分布式估计问题等价转换为分离凸优化问题形式，然后用增量次梯度算法求解。数值仿真结果表明所提框架可以有效解决一般的在网非线性估计问题，并取得与集中式估计可比的性能。
